# Supplementary material for: Single cell analyses identify a highly regenerative and homogenous human CD34+ hematopoietic stem cell population
Source: PubMed Central journal article supplement (PMC9018830; doi:10.1038/s41467-022-29675-w), 2022-04-19
Supplement: 41467_2022_29675_MOESM1_ESM.pdf [file 41467_2022_29675_MOESM1_ESM.pdf]

**Single Cell Analyses Identify a Highly Regenerative and Homogenous Human CD34+ Hematopoietic Stem Cell Population**

Fernando Anjos-Afonso, Florian Buettner, Syed Mian, Hefin Rhys, Jimena Perez-Lloret, Manuel Garcia-Albornoz, Linda Ariza-McNaughton and Dominique Bonnet

**Supplementary Information**

## Supplementary Figures

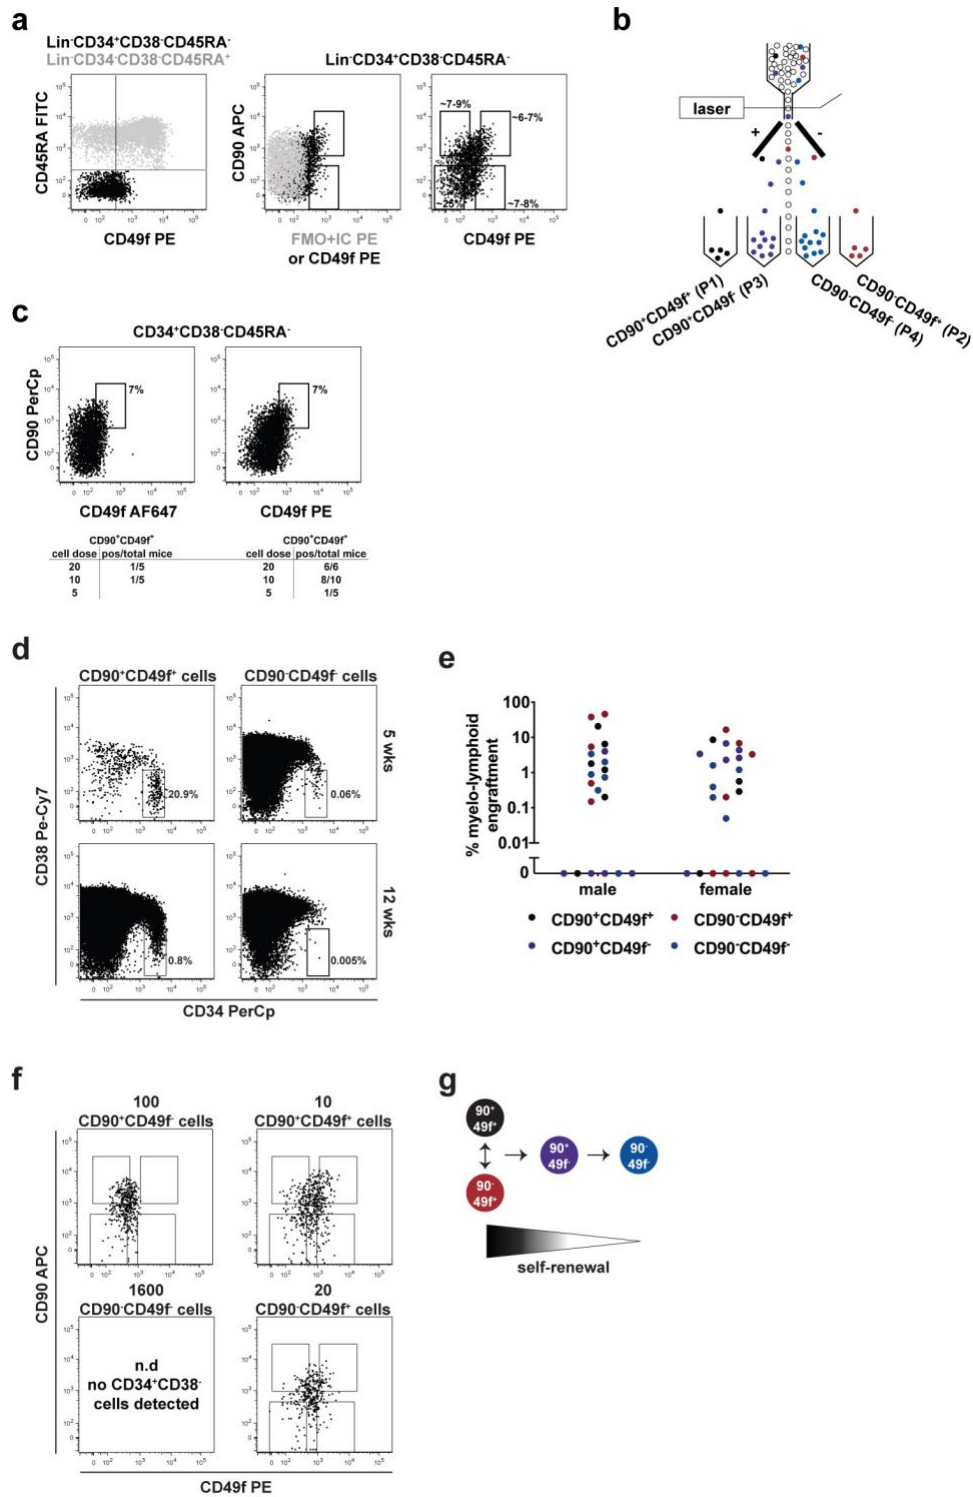

**Supplementary Fig. 1: Phenotypic and functional characterization of the four most primitive human HSPC populations.**

**a** Representative FCM plots showing the expression of CD49f antigen on human cord blood lineage negative (Lin<sup>-</sup>) cells. The left overlay plot shows that

the dim CD49f expression detected on CD34<sup>+</sup>CD38<sup>-</sup>CD45RA<sup>-</sup> HSPCs (black) was not due to the poor binding capacity of the anti-CD49f PE (clone GoH3) antibody used but owed to the weak CD49f expression on these cells, as the non-HSPCs (grey) were strongly stained. Fluorescent minus one (FMO) with an appropriate PE-conjugated isotype control antibody stain (grey in the middle overlay plot) was used to delineate the stringent gating of the four CD90<sup>+or-</sup>CD49f<sup>+or-</sup> populations (right plot). The values indicate the percentage range for each population within CD34<sup>+</sup>CD38<sup>-</sup>CD45RA<sup>-</sup> HSPCs used for cell sorting. **b** Schematic representation of the flow-sorting strategy. As an additional layer of quality control, during all first rounds of cell sorting the collection of the two CD49f<sup>+</sup> populations (P1 and P2) were assigned far apart from each other to minimize potential contamination between them. **c** PE and PE-Cy5 (not shown) but not AlexaFluor647 and FITC (not shown) conjugated anti-CD49f antibodies were able to reveal the dim CD49f expression on cord-blood CD34<sup>+</sup> HSPCs. As a result, CD90<sup>+</sup>CD49f<sup>+</sup> cells sorted using anti-CD49f AlexaFluor647 antibodies mostly failed to engraft at limiting cell doses as compared to cells sorted using anti-CD49f PE antibodies. **d** Representative FCM plots depicting the frequency of human CD34<sup>+</sup>CD38<sup>lo/-</sup> HSPCs found in the respective primary mouse BM at the indicated time points post-transplanted with ~1 CD90<sup>+</sup>CD49f<sup>+</sup> or CD90<sup>-</sup>CD49f<sup>-</sup> SRC. **e** Cumulative engraftment data derived from the four primitive populations assayed in NSG mice 12 wks after transplanting with ~1 SRC (data from **Fig. 1b**), showing no major difference in the level of engraftment between male and female recipients in the experimental settings used (n=10-13 mice/population). **f** Representative phenotype of the four sub-populations within CD34<sup>+</sup>CD38<sup>lo/-</sup>CD45RA<sup>-</sup>HSPCs detected in the respective primary mouse BM engrafted at 12 wks with 1 SRC dose of the indicated cell populations. Cumulative data from all the mice at the indicated time points is represented in **Fig. 1d**. n.d: not detected. **g** Schematic representation of the hierarchical organization within the most primitive CD34<sup>+</sup> compartment supported by the data presented in **Fig. 1**. Source data are provided as a Source Data file.

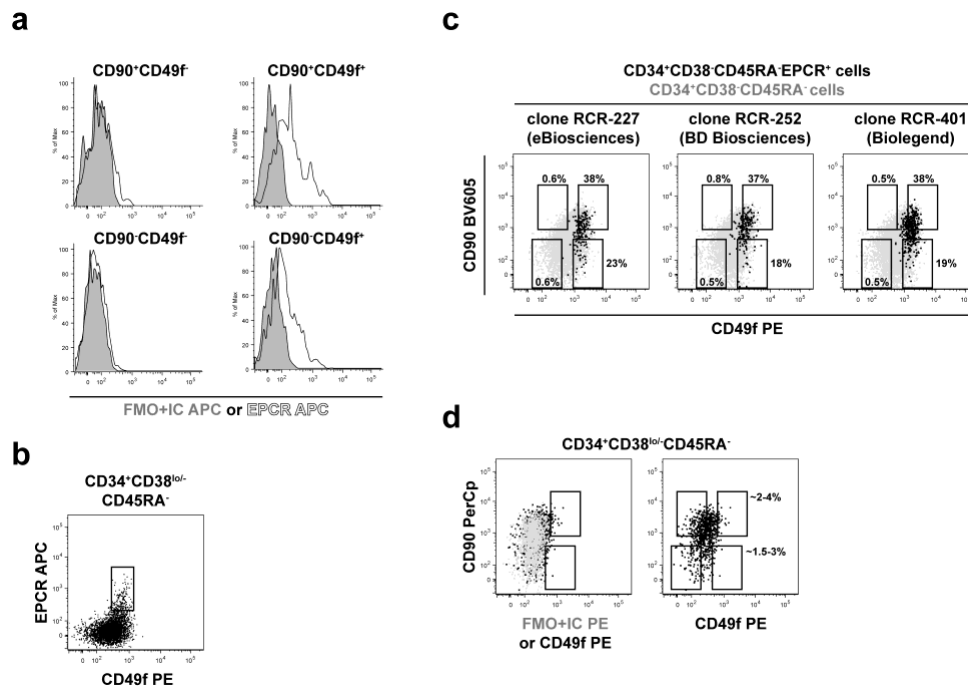

### Supplementary Fig. 2: Phenotypic characterization of EPCR<sup>+</sup> cells.

**a** Representative overlay FCM histograms illustrating the expression of EPCR (open) on the four most primitive human CD34<sup>+</sup> HSPCs. In this example, CD34<sup>+</sup> cells were stained with the anti-CD201 APC clone RCR-227 or with an appropriate APC-conjugated isotype antibody (grey; as FMO stain) as negative control. **b** Representative FCM plot illustrating that almost all EPCR<sup>+</sup> cells in the CD34<sup>+</sup>CD38<sup>-</sup>CD45RA<sup>-</sup> HSPC fraction express CD49f. **c** Representative overlay FCM plots showing that all the three clones highlighted EPCR<sup>+</sup> cells were mostly CD90<sup>+</sup>CD49f<sup>+</sup> and CD90<sup>-</sup>CD49f<sup>+</sup> cells. **d** An example of CD49f expression on adult BM CD34<sup>+</sup> cells by FCM analysis demonstrating almost negligible expression if this marker (black), as the fluorescent signal mostly overlapped with the signal derived from FMO with an appropriate PE-conjugated isotype control antibody stain (grey). Representative FCM plot illustrating the gating used to delineate the four populations based on CD90 and CD49f expressions on adult BM CD34<sup>+</sup> cells. The values indicate the percentage range for each population within CD34<sup>+</sup>CD38<sup>-</sup>CD45RA<sup>-</sup> HSPCs from 7 BM samples.

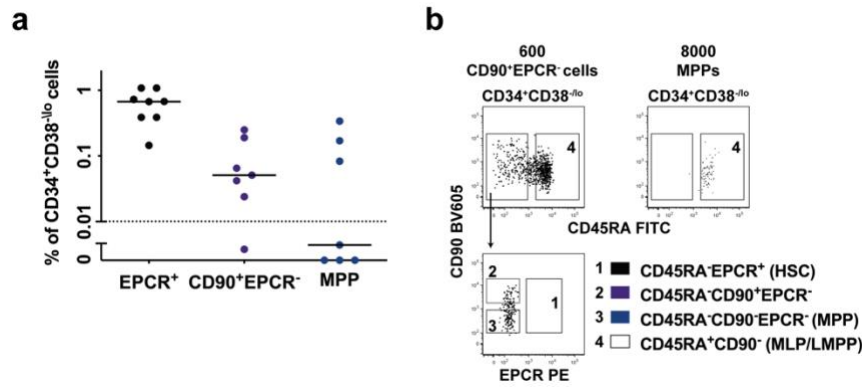

**Supplementary Fig. 3: Contribution of CD90<sup>+</sup>EPCR<sup>-</sup> cells to the different HSPCs *in vivo*.**

**a** Frequency of CD34<sup>+</sup>CD38<sup>lo</sup> HSPCs within human graft found in the BM of primary recipients transplanted with 15 EPCR<sup>+</sup> or 600 CD90<sup>+</sup>EPCR<sup>-</sup> cells or 8000 MPPs (~5 SRCs). Mice with sufficient human HSPC graft (above the dotted line) were used for analysis in **Fig. 4c** (n=7-8 mice); median lines are shown. **b** Representative FCM plots illustrating the phenotype of the denoted sub-populations within CD34<sup>+</sup>CD38<sup>lo</sup> HSPCs detected at 12 wks in the primary mouse bone marrow transplanted with CD90<sup>+</sup>EPCR<sup>-</sup> progenitors or MPPs. The CD201 clone RCR-401 antibody was used in these experiments. Source data are provided as a Source Data file.

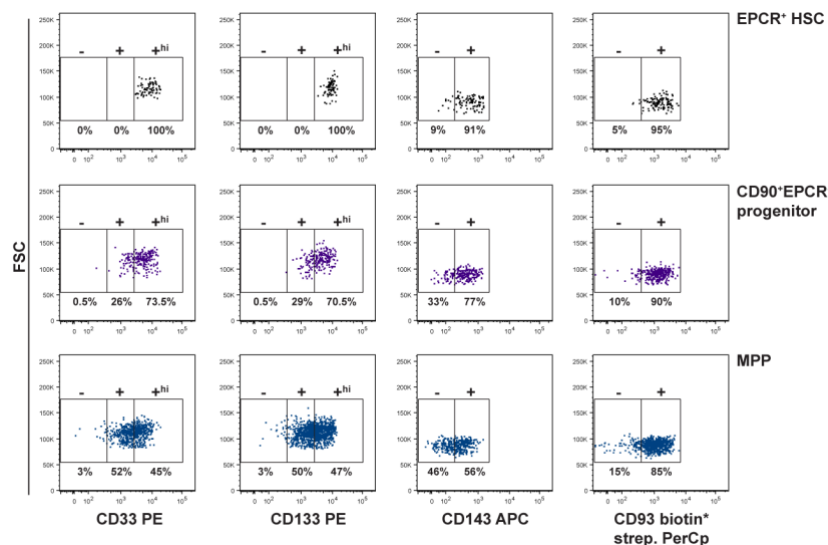

**Supplementary Fig. 4: Expression of different stem cell associated antigens on the most primitive human CD34<sup>+</sup> HSPCs.**

Representative FCM plots showing the expression of CD33, CD133 (AC133), CD143 (ACE2) and CD93 (C1qRp) on the denoted cell populations. The anti-CD201 clone RCR-227 and the anti-CD201 clone RCR-401 were used.

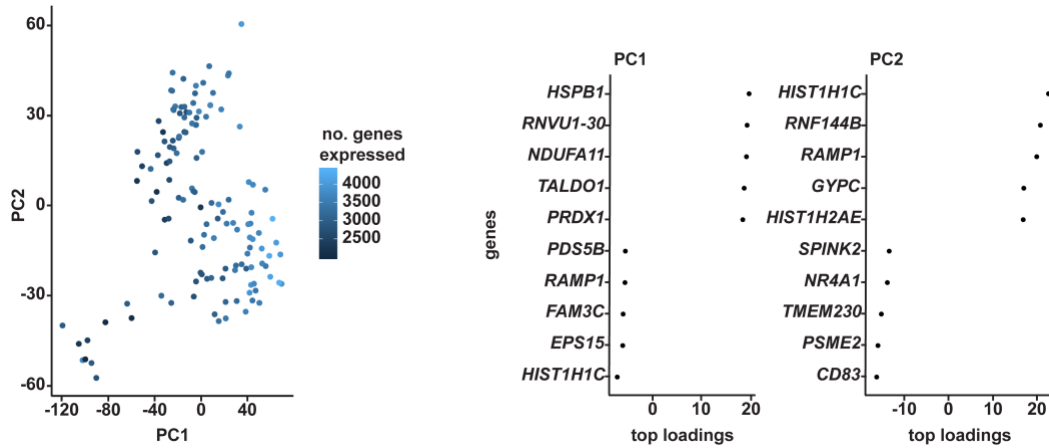

**Supplementary Fig. 5: Single cell transcriptomic analyses of EPCR+ HSCs.**

Two-dimensional representation of the scRNA-seq performed in 135 single EPCR+ HSCs (left graph) by PCA analysis. PCA visualization of the most variable genes in the EPCR+ HSCs (right graphs). Source data are provided as a Source Data file.

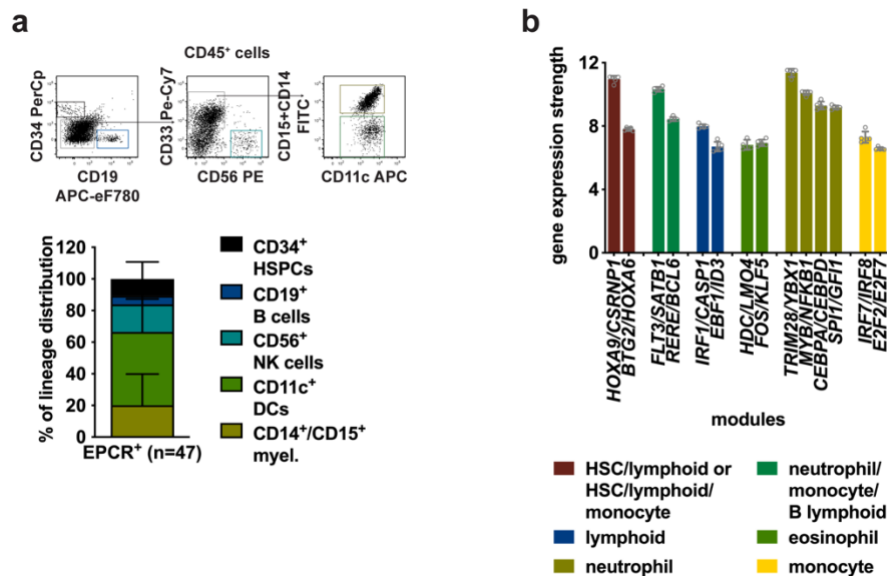

**Supplementary Fig. 6: *In vitro* multipotency of EPCR+ HSCs is supported by their transcriptomic wiring.**

**a** Representative FCM plots (top) illustrating the different cell lineage outputs derived from 3 EPCR+ HSCs in MS5-based culture (n=47). The focus was on myeloid vs lymphoid lineages: B lymphoid cells, CD19+(CD34-CD33-); NK-like cells CD56+(CD34-CD33-CD19-); myeloid cells, CD14+/CD15+ (CD34-CD33+); myeloid-derived DC-like cells, CD11c+CD33+(CD34-CD19-). Cumulative data from all the individual cultures (n=47) is shown (bottom graph; from 3 independent experiments). **b** Expression strength of the genes associated with the denoted lineage-priming modules<sup>8</sup> detected in EPCR+ HSCs (n=5). Bars are the mean values and error bars are the S.D for the no. of experiments performed. data are provided as a Source Data file.

## Supplementary Table I

Detailed information of the reagents used in this study.

| REAGENTS/RESOURCES                                                                        | SOURCE                               | IDENTIFIER |
|-------------------------------------------------------------------------------------------|--------------------------------------|------------|
| <b>Antibodies (Flow Cytometry)</b>                                                        |                                      |            |
| CD11c APC                                                                                 | BD Biosciences                       | B-ly6      |
| CD14 FITC                                                                                 | BD Biosciences                       | M5E2       |
| CD15 FITC                                                                                 | BD Biosciences                       | HI98       |
| CD19 APC-eFluor780                                                                        | Thermo Fisher Scientific/eBioscience | HIB19      |
| CD19 FITC                                                                                 | BD Biosciences                       | HIB19      |
| CD33 PE                                                                                   | BD Biosciences                       | WM53       |
| CD33 PE-Cy7                                                                               | Thermo Fisher Scientific/eBioscience | WM53       |
| CD34 FITC                                                                                 | BD Biosciences                       | 581        |
| CD34 PerCp                                                                                | BD Biosciences                       | 8G12       |
| CD38 PE-Cy7                                                                               | Thermo Fisher Scientific/eBioscience | HB7        |
| CD38 APC-eFluor780                                                                        | Thermo Fisher Scientific/eBioscience | HB7        |
| CD45 FITC                                                                                 | BD Biosciences                       | HI30       |
| CD45 PerCp                                                                                | BD Biosciences                       | HI30       |
| CD45 APC                                                                                  | BD Biosciences                       | HI30       |
| CD45RA FITC                                                                               | BD Biosciences                       | HI100      |
| CD45RA PE-Cy7                                                                             | Thermo Fisher Scientific/eBioscience | HI100      |
| CD49f PE                                                                                  | BD Biosciences                       | GoH3       |
| CD49f AlexaFluor 647                                                                      | BD Biosciences                       | GoH3       |
| CD56 PE                                                                                   | BD Biosciences                       | B159       |
| CD90 PerCp-eFluor710                                                                      | Thermo Fisher Scientific/eBioscience | 5E10       |
| CD90 APC                                                                                  | Thermo Fisher Scientific/eBioscience | 5E10       |
| CD90 BV605                                                                                | BD Biosciences                       | 5E10       |
| CD93/C1qRp Biotin                                                                         | Biolegend                            | VIMD2      |
| CD133 PE                                                                                  | Miltenyi Biotec                      | AC133      |
| CD143 APC                                                                                 | BD Biosciences                       | BB9        |
| CD201/EPCR PE                                                                             | BD Biosciences                       | RCR-252    |
| CD201/EPCR APC                                                                            | BD Biosciences                       | RCR-252    |
| CD201/EPCR PE                                                                             | Biolegend                            | RCR-401    |
| CD201/EPCR APC                                                                            | Biolegend                            | RCR-401    |
| CD201/EPCR APC                                                                            | Thermo Fisher Scientific/eBioscience | RCR-227    |
| <b>Chemicals and Recombinant Proteins for Cell Culture and <i>in vivo</i> Experiments</b> |                                      |            |
| Ficoll-Paque                                                                              | GE Healthcare Life Sciences          | 17-1440-02 |
| EasySep CD34 <sup>+</sup> Selection Kit II                                                | StemCell Technologies                | 17856      |

|                                                                |                                     |              |
|----------------------------------------------------------------|-------------------------------------|--------------|
| EasySep Mouse/Human Chimera Enrichment kit                     | StemCell Technologies               | 19849        |
| StemSep Human Progenitor Enrichment Kit                        | StemCell Technologies               | 14056        |
| Collagen Solution                                              | StemCell Technologies               | 04902        |
| alpha-Minimum Essential media with nucleosides ( $\alpha$ MEM) | Thermo Fisher Scientific/Gibco      | 22571038     |
| MyeloCult™ H5100                                               | StemCell Technologies               | 05150        |
| StemSpan™ SFEM II                                              | StemCell Technologies               | 09605        |
| IL2                                                            | Peprotech                           | 200-02       |
| IL7                                                            | Peprotech                           | 200-07       |
| IL15                                                           | Peprotech                           | 200-15       |
| FLT3L                                                          | Peprotech                           | 300-19       |
| G-CSF                                                          | Peprotech                           | 300-23       |
| SCF                                                            | Peprotech                           | 300-07       |
| TPO                                                            | Peprotech                           | 300-18       |
| Immune Globulin Intravenous (IVIG; human)                      | Bio Products Laboratory (BPL)       | Gammaplex 5% |
| Betamox 150 mg/ml suspension for injection                     | Norbrook                            | Betamox LA   |
| 4',6-Diamidino-2-phenylindole dihydrochloride (DAPI)           | Merck/Sigma-Aldrich                 | D8417        |
| CellTrace™ Violet staining kit                                 | Thermo Fisher Scientific            | C34557       |
| TMRE (tetramethylrhodamine ethyl ester)                        | BD Biosciences                      | 564696       |
| CellTitre-Glow 2.0 kit                                         | Promega                             | G9241        |
| Click-&-Go Plus 488 OPP Protein Synthesis Assay Kit            | Clickchemistrytools                 | 1493         |
| Saponin                                                        | Merck-Sigma                         | 47036        |
| <b>Reagents and Materials for Molecular Biology</b>            |                                     |              |
| 96-well skirted FrameStar PCR plates                           | 4titude                             | 4ti-0960     |
| TriXonX-100 solution                                           | Merck/Sigma-Aldrich                 | 93443        |
| RNAse inhibitor                                                | Thermo Fisher Scientific/Ambion     | AM2682       |
| KAPA Stranded with RiboErase RNA-seq kit                       | KAPA Biosystems                     | KK8483       |
| Kapa Dual-Indexed Adapters                                     | KAPA Biosystems                     | KK8720       |
| RNeasy Plus Micro Kit                                          | Qiagen                              | 74034        |
| Agencourt AMPure XP beads                                      | Beckman Coulter                     | A63880       |
| Nextera™ XT DNA Sample Prep Kit                                | Illumina                            | FC-131-1096  |
| C1™ Single-Cell Reagent Kit for mRNA Seq                       | Fluidigm                            | 100-6201     |
| Ethidium homodimer-1                                           | Thermo Fisher Scientific/Invitrogen | E1169        |
| Calcein AM                                                     | Thermo Fisher Scientific/Invitrogen | C3099        |



|                                                    |                                  |                                                                                                                                           |
|----------------------------------------------------|----------------------------------|-------------------------------------------------------------------------------------------------------------------------------------------|
| SMART-Seq v4 Ultra Low Input RNA Kit for C1 System | Takara                           | 635026                                                                                                                                    |
| <b>Software and Algorithms</b>                     |                                  |                                                                                                                                           |
| FACSDiva v. 8.0.1.1                                | BD Biosciences                   | N/A                                                                                                                                       |
| FlowJo v 9.96 and 10.6.2                           | FlowJo, LLC                      | N/A                                                                                                                                       |
| Extreme Limiting Dilution Analysis (ELDA)          | Hu and Smyth (2009)              | <a href="http://bioinf.wehi.edu.au/software/el-da/index.html">http://bioinf.wehi.edu.au/software/el-da/index.html</a>                     |
| Prism 8.4.2                                        | GraphPad Software                | N/A                                                                                                                                       |
| Adobe Illustrator 26.0.3                           | Adobe Inc.                       | N/A                                                                                                                                       |
| DeSeq2 V1.28.1                                     | Love <i>et al.</i> , 2014        | <a href="https://biocductor.org/packages/release/bioc/html/DESeq2.html">https://biocductor.org/packages/release/bioc/html/DESeq2.html</a> |
| GSEA 4.1.0                                         | Subramanian <i>et al.</i> , 2005 | <a href="http://www.gsea-msigdb.org/gsea/index.jsp">www.gsea-msigdb.org/gsea/index.jsp</a>                                                |
| STAR_2.4                                           | Dobin <i>et al.</i> , 2013       | <a href="https://github.com/alexdobin/STAR">https://github.com/alexdobin/STAR</a>                                                         |
| RSEM_1.2.8                                         | Li <i>et al.</i> , 2011          | <a href="https://github.com/deweylab/RSEM">https://github.com/deweylab/RSEM</a>                                                           |
| R 3.5.0                                            | N/A                              | <a href="https://www.r-project.org">https://www.r-project.org</a>                                                                         |
