# Supplementary material for: Single cell analyses identify a highly regenerative and homogenous human CD34+ hematopoietic stem cell population
Source: PubMed Central journal article supplement (PMC9018830; doi:10.1038/s41467-022-29675-w), 2022-04-19
Supplement: 41467_2022_29675_MOESM3_ESM.pdf [file 41467_2022_29675_MOESM3_ESM.pdf]

## Description of Additional Supplementary Files

**File name: Supplementary Data 1**

**Description: *In vivo* LDA data.**

Tables with the *in vivo* limiting dilution assay data.

**File name: Supplementary Data 2**

**Description: Bulk RNA-Seq., of the four human HSPC populations.**

Tables with DE genes from the bulk RNA-seq analyses between the four CD90<sup>+</sup>or- CD49f<sup>+</sup>or- HSPCs.

**File name: Supplementary Data 3**

**Description: scRNA-Seq., CD90<sup>+</sup>or-CD49f<sup>+</sup>**

Data analysis of the single-cell RNA-seq experiments between the two CD49f<sup>+</sup> HSC-enriched populations.

**File name: Supplementary Data 4**

**Description: bulk RNA-Seq., EPCR<sup>+</sup>vsCD90<sup>+</sup>EPCR<sup>-</sup>vsMPP**

Tables with DE genes from the bulk RNA-seq analyses between the three most primitive human HSPC populations.
